# Supplementary material
Source: Springer Nature journal article supplement (https://www.springermedizin.de/resource/supplementary/12883_2004_38_MOESM1_ESM.pdf/9456720)
Supplement: MOESM1 [file 9456720]

**Filescreening (n=188)**

**Not invited for screening (n=37)**

**Screened (n=151)**

**Not randomized (n=93)**

withdrew consent (n= 41 )

other signif. diagnosis (e.g. CRPS II, (n= 20 )

age (n= 5 )

insufficient pain score (n= 14 )

other criteria (n= 13 )

**Randomized (n=58)**

| withdrawn (n=12)            | placebo | GBP | wash-out |
|-----------------------------|---------|-----|----------|
| adverse effects (n= 3)      | 0       | 3   | 0        |
| treatment failure (n= 0)    | 0       | 0   | 0        |
| illness (n=1)               | 1       | 0   | 0        |
| lost to follow up (n= 2 )   | 2       | 0   | 0        |
| wanted to drive car (n= 3)  | 2       | 1   | 0        |
| holiday trip (n=1)          | 1       | 0   | 0        |
| personal reasons (n=1)      | 0       | 0   | 1        |
| start other treatment (n=1) | 0       | 0   | 1        |
